# Supplementary material for: T-cell receptor structures and predictive models reveal comparable alpha and beta chain structural diversity despite differing genetic complexity
Source: Springer Nature journal article supplement (doi:10.1038/s42003-025-07708-6), 2025-03-04
Supplement: MOESM1 [file 42003_2025_7708_MOESM1_ESM.pdf]

1

# Supplementary Information:

2

T-cell receptor structures and predictive models reveal

3

comparable alpha and beta chain structural diversity despite

4

differing genetic complexity

5

Nele P. Quast, Brennan Abanades, Bora Guloglu, Vijaykumar Karuppiah,

Stephen Harper, Matthew I. J. Raybould, Charlotte M. Deane\*

6

7

## Contents

8

**1 SI Tables (1-12) 2**

9

**2 SI Figures (1-22) 6**

10

**3 SI Notes (1-3) 21**

11

3.1 Accurate prediction of both CDR3 $\alpha$  and CDR3 $\beta$  is required for TCR:pMHC interface  
characterisation using physics-driven docking . . . . . 21

12

13

3.2 Molecular dynamics suggests ensembles of models generated by TCR structure pre-  
dictors may represent alternative, physically plausible apo states . . . . . 24

14

15

3.3 Structural distance calculation for length-mismatched CDR loops . . . . . 27

16 **1 SI Tables (1-12)**

|      |      |      |      |      |      |      |      |      |      |
|------|------|------|------|------|------|------|------|------|------|
| 4nhu | 5wlg | 6zkx | 7dzm | 7dzn | 7f5k | 7fje | 7l1d | 7n2o | 7n2q |
| 7n2r | 7n2s | 7n5c | 7n5p | 7na5 | 7ndq | 7ndt | 7nme | 7ow5 | 7pb2 |
| 7pbc | 7pbe | 7pdw | 7phr | 7q9b | 7qpj | 7r7z | 7rdv | 7rk7 | 7rm4 |
| 7rrg | 7s8i | 7sg1 | 7su9 | 7t2b | 7t2c | 7z50 | 7zt7 | 8cx4 | 8d5q |
| 8dnt | 8es9 | 8gvb | 8gvi | 8shi |      |      |      |      |      |

SI Table 1: PDB codes of 45 TCRs in the test set.

| Length | CDR1 $\alpha$ | CDR2 $\alpha$ | CDR3 $\alpha$ | CDR1 $\beta$ | CDR2 $\beta$ | CDR3 $\beta$ |
|--------|---------------|---------------|---------------|--------------|--------------|--------------|
| 5      | 15            | 19            | -             | 21           | 5            | -            |
| 6      | 64            | 33            | -             | 7            | 57           | -            |
| 7      | 17            | 59            | -             | -            | 8            | -            |
| 8      | -             | 22            | 8             | -            | -            | -            |
| 9      | -             | -             | 37            | -            | -            | 24           |
| 10     | -             | -             | 80            | -            | -            | 54           |
| 11     | -             | -             | 121           | -            | -            | 99           |
| 12     | -             | -             | 67            | -            | -            | 136          |
| 13     | -             | -             | 77            | -            | -            | 66           |
| Total  | 96            | 133           | 390           | 28           | 70           | 379          |

SI Table 2: Number of clusters of TCRBuilder2+ training structures by greedy clustering by RMSD with 1Å clustering threshold. ‘-’ indicates less than 10 loops of that length existed in the training set to cluster. There are approximately as many CDR3 $\alpha$  clusters as CDR3 $\beta$  clusters, suggesting CDR3 $\alpha$  loops are as structurally diverse as CDR3 $\beta$  loops. There are substantially more CDR3 loop clusters than CDR1 and CDR2 clusters.

|                    | A             | fwa           | CDR1 $\alpha$ | CDR2 $\alpha$ | CDR3 $\alpha$ | B             | fwb           | CDR1 $\beta$  | CDR2 $\beta$  | CDR3 $\beta$  |
|--------------------|---------------|---------------|---------------|---------------|---------------|---------------|---------------|---------------|---------------|---------------|
| TCRBuilder2        | 1.0000        | 1.0000        | 1.0000        | 1.0000        | 1.0000        | 1.0000        | 1.0000        | 1.0000        | 1.0000        | 1.0000        |
| TCRBuilder2+       | 0.4907        | 0.1261        | 0.9250        | 0.1720        | 0.9977        | 0.9135        | 0.6431        | 0.1555        | 0.3081        | 0.5788        |
| Alphafold3         | <b>0.0007</b> | <b>0.0000</b> | <b>0.0435</b> | 0.8349        | 0.2956        | 0.5285        | 0.2293        | 0.5983        | 0.3693        | 0.5021        |
| ABodyBuilder2      | <b>0.0000</b> | <b>0.0000</b> | <b>0.0000</b> | <b>0.0000</b> | <b>0.0000</b> | <b>0.0000</b> | <b>0.0000</b> | <b>0.0000</b> | <b>0.0000</b> | <b>0.0000</b> |
| Alphafold Multimer | 0.0601        | <b>0.0000</b> | 0.3340        | 0.3420        | 0.7982        | 0.9320        | 0.5170        | 0.8258        | 0.1368        | 0.4312        |
| LYRA*              | 0.6174        | 0.0481        | 0.2020        | 0.8099        | 0.0045        | 0.7554        | 0.9723        | 0.1043        | 0.4895        | 0.1154        |
| TCRmodel           | 0.1099        | 0.1295        | 0.0869        | 0.1310        | 0.0107        | 0.6736        | 0.7640        | 0.0916        | 0.7466        | 0.4053        |

SI Table 3: P values of a two-tailed test on the t-statistic of the RMSD of a given model compared to TCRBuilder2. Statistically significant values (5% threshold) in bold. Apart from ABodyBuilder2, differences in the RMSD of different models are not statistically significant, with the exception of the  $\alpha$  chain framework for Alphafold Multimer, and the  $\alpha$  chain framework, CDR $\alpha$ 1, and whole  $\alpha$  chain for Alphafold3.

| Model              | A  | fwa | CDR1 $\alpha$ | CDR2 $\alpha$ | CDR3 $\alpha$ | B  | fwb | CDR1 $\beta$ | CDR2 $\beta$ | CDR3 $\beta$ |
|--------------------|----|-----|---------------|---------------|---------------|----|-----|--------------|--------------|--------------|
| TCRBuilder2+       | 43 | 45  | 37            | 43            | 21            | 42 | 45  | 44           | 44           | 34           |
| TCRBuilder2        | 45 | 45  | 36            | 45            | 23            | 43 | 45  | 45           | 45           | 26           |
| Alphafold Multimer | 44 | 45  | 37            | 43            | 27            | 43 | 45  | 44           | 45           | 32           |
| TCRmodel           | 35 | 39  | 28            | 37            | 10            | 37 | 39  | 36           | 39           | 23           |
| Alphafold3         | 45 | 45  | 39            | 43            | 25            | 44 | 45  | 44           | 43           | 33           |
| LYRA*              | 35 | 38  | 27            | 36            | 8             | 38 | 38  | 36           | 38           | 20           |
| ABodyBuilder2      | 0  | 0   | 0             | 0             | 6             | 0  | 1   | 0            | 0            | 4            |

SI Table 4: Number of test set predictions per model with RMSD  $< 2\text{\AA}$ . TCRBuilder2+ outperforms TCRBuilder2 and Alphafold Multimer for CDR3 $\beta$ , but retrieves fewer CDR3 $\alpha$  structures. \*LYRA, the homology method, could only be evaluated on 38 of the 45 test structures for which a structure was generated.

|               | 0.5  | 1.0 | 1.5 | 2.0 | 2.5 | 3.0 | 3.5 | 4.0 | 4.5 |
|---------------|------|-----|-----|-----|-----|-----|-----|-----|-----|
| CDR1 $\alpha$ | 501  | 126 | 45  | 23  | 12  | 9   | 4   | 3   | 3   |
| CDR1 $\beta$  | 215  | 34  | 9   | 6   | 5   | 2   | 1   | 1   | 1   |
| CDR2 $\alpha$ | 604  | 200 | 84  | 42  | 27  | 17  | 9   | 7   | 7   |
| CDR2 $\beta$  | 415  | 105 | 45  | 23  | 13  | 8   | 5   | 2   | 2   |
| CDR3 $\alpha$ | 994  | 840 | 410 | 148 | 62  | 22  | 13  | 5   | 4   |
| CDR3 $\beta$  | 1000 | 828 | 417 | 178 | 71  | 32  | 19  | 11  | 5   |

SI Table 5: Number of clusters for each CDR loop identified for a sample of 1000 OTS TR-Builder2+ structure predictions for varying RMSD thresholds in Ångströms.

|       | 0.5 | 1.0 | 1.5 | 2.0 | 2.5 | 3.0 | 3.5 | 4.0 | 4.5 |
|-------|-----|-----|-----|-----|-----|-----|-----|-----|-----|
| CDRL1 | 90  | 31  | 19  | 16  | 11  | 7   | 6   | 5   | 5   |
| CDRH1 | 121 | 19  | 8   | 5   | 2   | 2   | 2   | 1   | 1   |
| CDRL2 | 25  | 9   | 7   | 6   | 5   | 4   | 4   | 3   | 3   |
| CDRH2 | 156 | 36  | 18  | 11  | 9   | 5   | 4   | 4   | 3   |
| CDRL3 | 391 | 131 | 56  | 23  | 12  | 7   | 6   | 4   | 4   |
| CDRH3 | 995 | 880 | 659 | 406 | 208 | 105 | 61  | 39  | 25  |

SI Table 6: Number of clusters for each CDR loop identified for a sample of 1000 OAS ABody-Builder2 structure predictions for varying RMSD thresholds in Ångströms.

| Gene type                         | TRA  | TRB  | IGL/K   | IGH  |
|-----------------------------------|------|------|---------|------|
| V                                 | 45   | 48   | 33/41   | 57   |
| D                                 | -    | 2    | -       | 23   |
| J                                 | 51   | 13   | 5/5     | 6    |
| Potential combinatorial diversity | 2295 | 1248 | 165/205 | 7866 |

SI Table 7: Number of functional IMGT [1] catalogued human genes for the TRA, TRB, IGL/K, and IGH loci. TRA and TRB are the TCR alpha and beta loci respectively. IGL/K are the antibody light chain loci, split into lambda and kappa genes. IGH is the antibody heavy chain locus. V, J and D are the variable, joining, and diversity segments respectively. A relatively large number of joining genes have been observed for the TRA locus compared to TRB and IG loci. The large number of TRAJ and low number of TRBD result in comparable potential combinatorial diversity of TCR alpha and beta sequences.

| Allele type                       | TRA  | TRB  | IGL/K   | IGH    |
|-----------------------------------|------|------|---------|--------|
| V                                 | 112  | 121  | 99/86   | 346    |
| D                                 | -    | 3    | -       | 33     |
| J                                 | 61   | 15   | 7/9     | 16     |
| Potential combinatorial diversity | 6852 | 5445 | 693/774 | 182688 |

SI Table 8: Number of functional IMGT [1] catalogued human alleles for the TRA, TRB, IGL/K, and IGH loci. TRA and TRB are the TCR alpha and beta loci respectively. IGL/K are the antibody light chain loci, split into lambda and kappa genes. IGH is the antibody heavy chain locus. V, J and D are the variable, joining, and diversity segments respectively.

|               | 1.0  | 0.9  | 0.8  | 0.7 | 0.6 | 0.5 | 0.4 | 0.3 | 0.2 | 0.1 | 0.0 |
|---------------|------|------|------|-----|-----|-----|-----|-----|-----|-----|-----|
| CDR1 $\alpha$ | 65   | 65   | 50   | 49  | 30  | 22  | 8   | 7   | 2   | 1   | 1   |
| CDR2 $\alpha$ | 59   | 59   | 50   | 48  | 37  | 20  | 16  | 9   | 6   | 2   | 1   |
| CDR3 $\alpha$ | 1968 | 1705 | 1012 | 450 | 168 | 64  | 32  | 15  | 3   | 2   | 1   |
| CDR1 $\beta$  | 44   | 44   | 44   | 17  | 16  | 8   | 6   | 6   | 2   | 2   | 1   |
| CDR2 $\beta$  | 57   | 57   | 47   | 47  | 23  | 22  | 11  | 10  | 3   | 2   | 1   |
| CDR3 $\beta$  | 1998 | 1938 | 1490 | 758 | 256 | 64  | 22  | 10  | 3   | 2   | 1   |

SI Table 9: Number of sequence clusters emerging from 2000 randomly sampled TCRs from OTS, by TCR loop and sequence identity clustering threshold.

| Model              | Compute resource | Mean inference time per TCR | Relative speed up |
|--------------------|------------------|-----------------------------|-------------------|
| TCRBuilder2+       | CPU i7 core      | 24.4 sec                    | 261 x             |
| Alphafold Multimer | GPU Ampere A100  | 110 min 19.6 sec            | 1 x               |

SI Table 10: Inference time of TCRBuilder2+ compared to Alphafold Multimer. TCRBuilder2+ offers a 261-times speed up on computationally cheaper CPU compared to Alphafold Multimer running on GPU, enabling inference of TCR structures at repertoire scale with lower compute resource requirements.

|                    | CDR3 $\alpha$ | CDR3 $\beta$ |
|--------------------|---------------|--------------|
| TCRBuilder2+       | 3.48          | 3.15         |
| AlphaFold Multimer | 2.80          | 2.30         |

SI Table 11: Mean number of conformation clusters per TCR sequence predicted, 1Å RMSD threshold.

| Stage | Ensemble     | Restrained Atoms | Restraint Strength (kJ mol <sup>-1</sup> nm <sup>-2</sup> ) | Duration   | Start T (K) | End T (K) |
|-------|--------------|------------------|-------------------------------------------------------------|------------|-------------|-----------|
| 1     | Minimisation | Protein Heavy    | 4184.00                                                     | 5000 steps | -           | -         |
| 2     | NVT          | Protein Heavy    | 4184.00                                                     | 0.2 ns     | 100         | 300       |
| 3     | NPT          | Protein Heavy    | 4184.00                                                     | 0.2 ns     | 300         | 300       |
| 4     | NPT          | Protein Heavy    | 2092.00                                                     | 0.5 ns     | 300         | 300       |
| 5     | Minimisation | Backbone Heavy   | 2092.00                                                     | 5000 steps | -           | -         |
| 6     | NPT          | Backbone Heavy   | 2092.00                                                     | 0.2 ns     | 300         | 300       |
| 7     | NPT          | Backbone Heavy   | 418.40                                                      | 0.2 ns     | 300         | 300       |
| 8     | NPT          | Backbone Heavy   | 41.84                                                       | 0.2 ns     | 300         | 300       |
| 9     | NPT          | -                | -                                                           | 1 ns       | 300         | 300       |

SI Table 12: Molecular dynamics equilibration protocol. Parameters and steps used during the equilibration of simulated systems.

17 2 SI Figures (1-22)

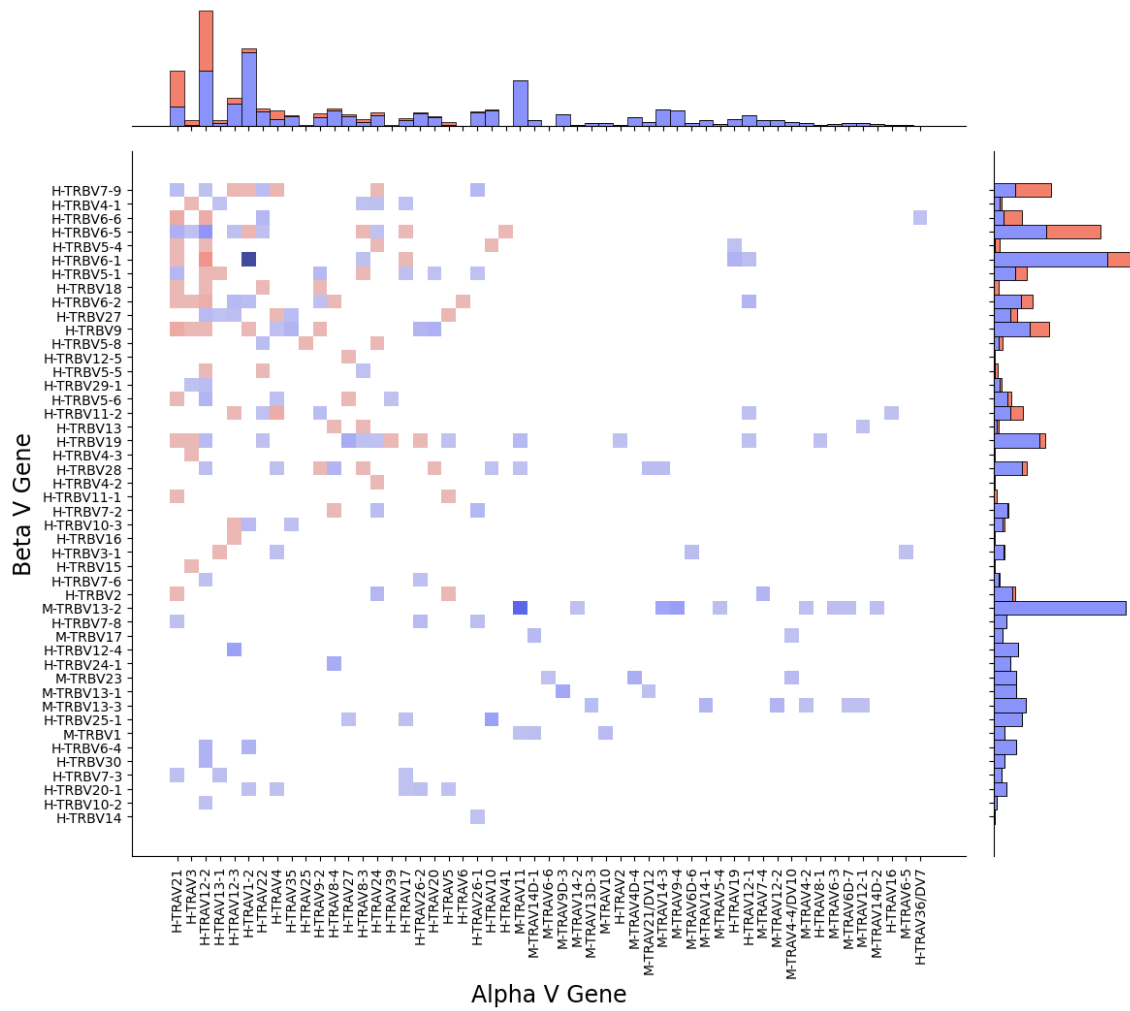

SI Figure 1: Joint distribution of TRAV and TRBV genes in the training data. STCRDab data in blue, Immunocore data in red. Human genes annotated ‘H-’, murine genes annotated ‘M-’.

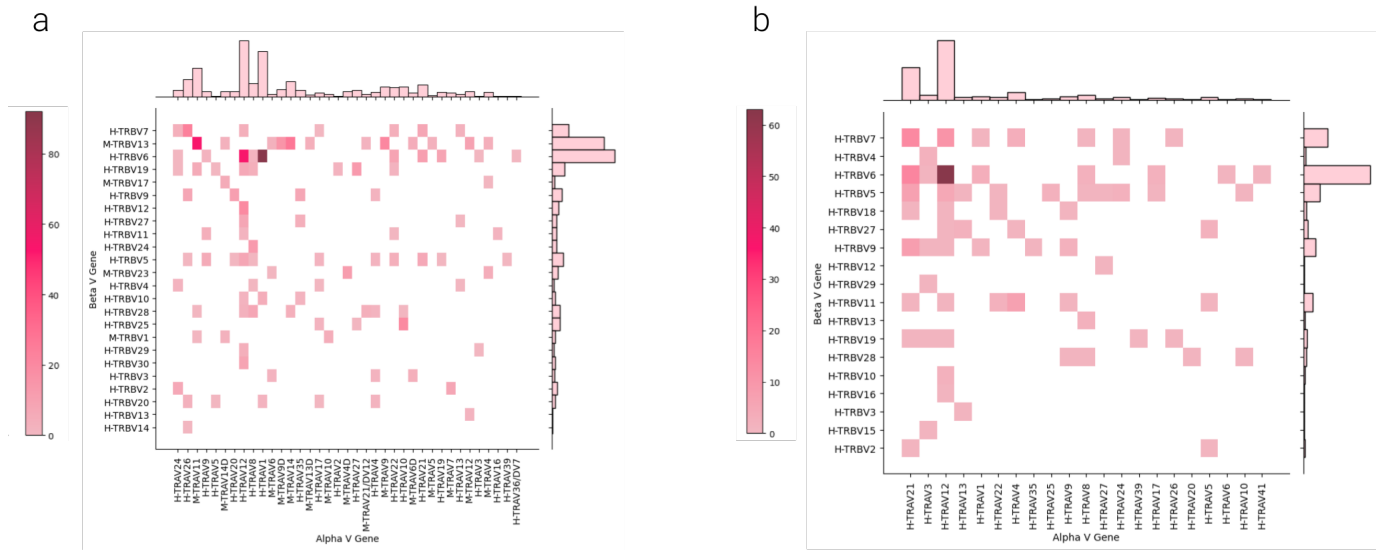

SI Figure 2: Joint distribution of alpha and beta V gene subgroups of TCR structures in the training data. a) Joint distribution of TCRs sourced from STCRDab. b) Joint distribution of TCRs provided by Immunocore. Genes beginning with ‘H-’ are human, those beginning with ‘M-’ are murine.

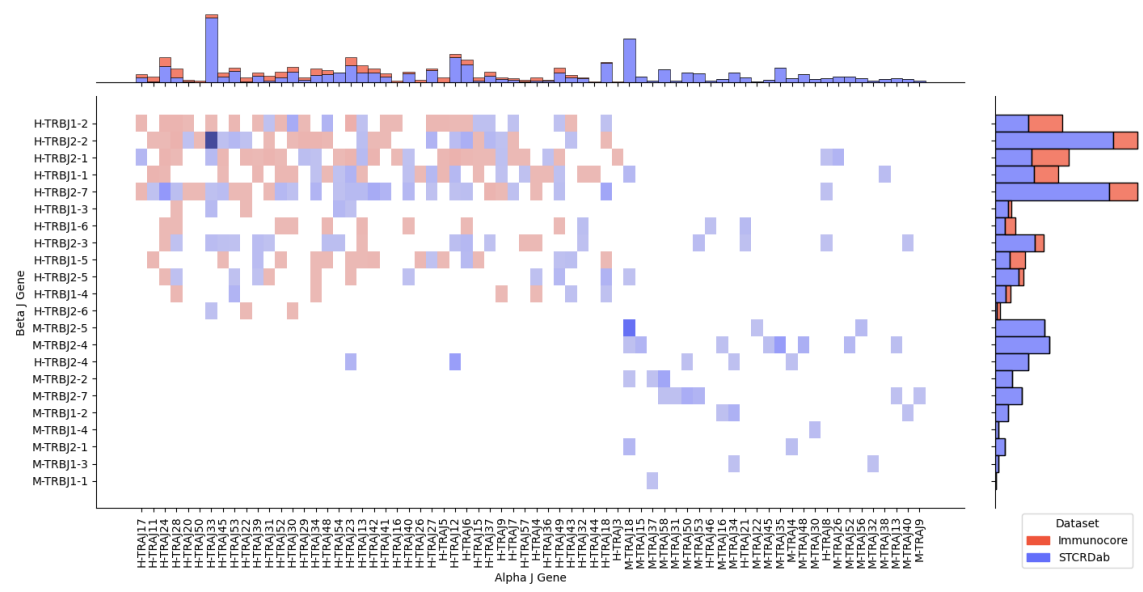

SI Figure 3: Joint distribution of alpha and beta J genes of TCR structures in the training data, coloured by data source (STCRDab in blue, Immunocore in red). Genes beginning with ‘H-’ are human, those beginning with ‘M-’ are murine.

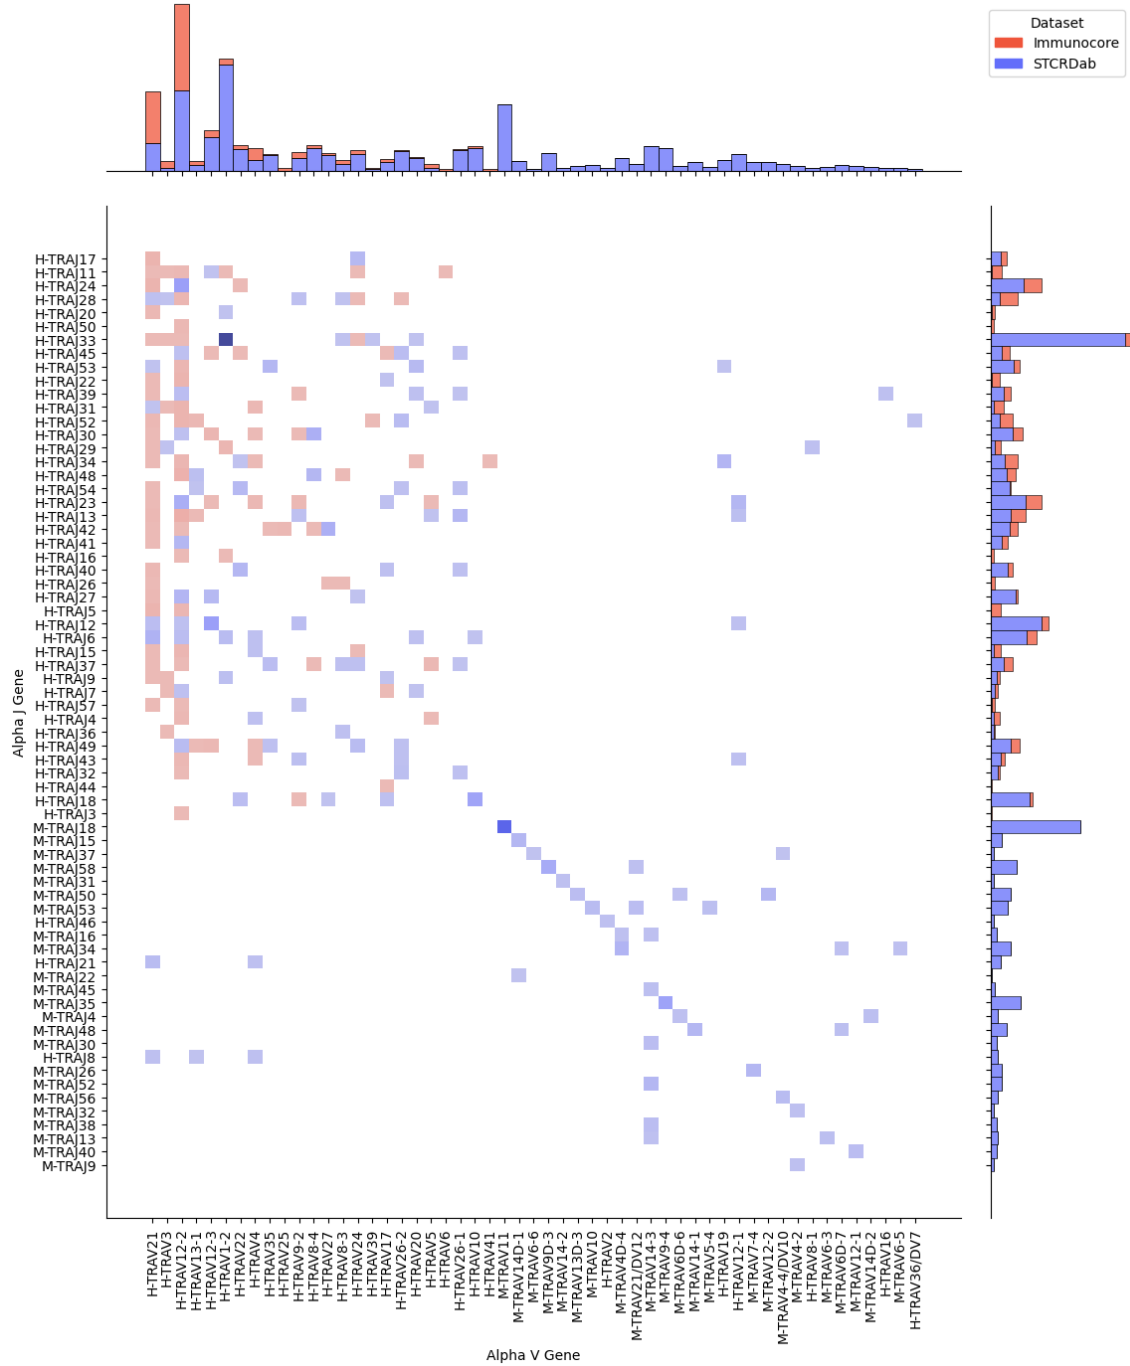



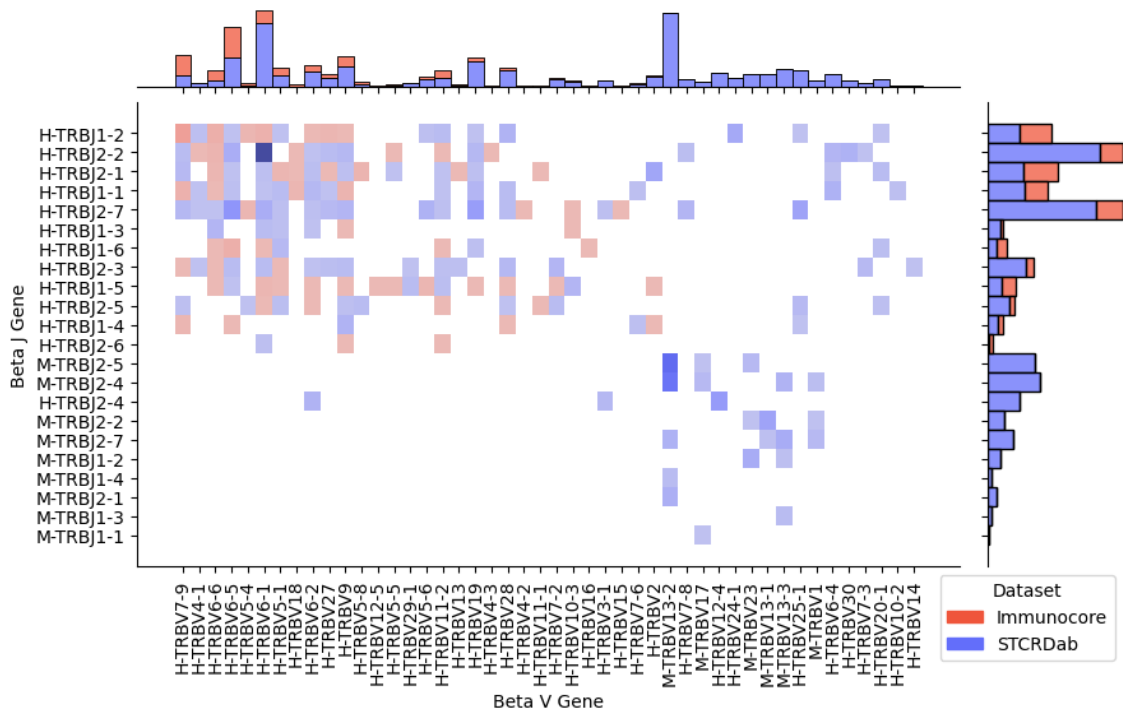

SI Figure 5: Joint distribution of TRBV and TRBJ genes of TCR structures in the training data, coloured by data source (STCRDab in blue, Immunocore in red). Genes beginning with ‘H-’ are human, those beginning with ‘M-’ are murine.

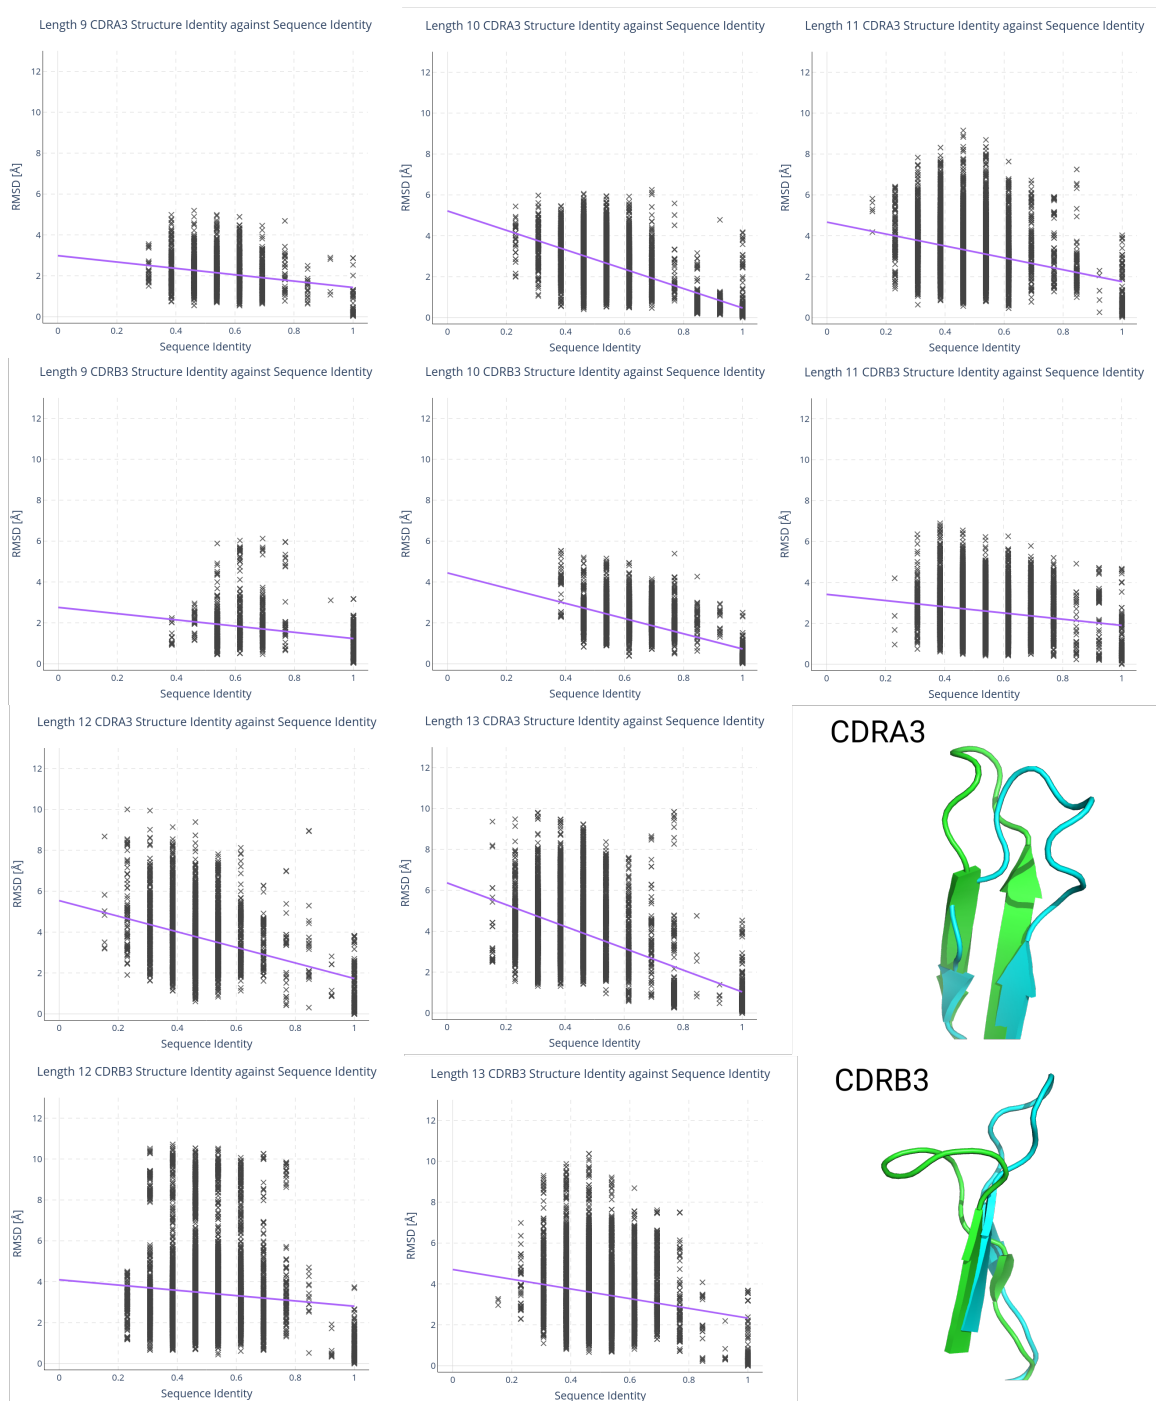

SI Figure 6: Pairwise RMSD *vs* sequence identity distribution of training data by loop length. Examples of identical sequence loops with high RMSD suggest that both CDR3 $\alpha$  and CDR3 $\beta$  structures are diverse and are often not predictable from just the sequence of the CDR3 region.

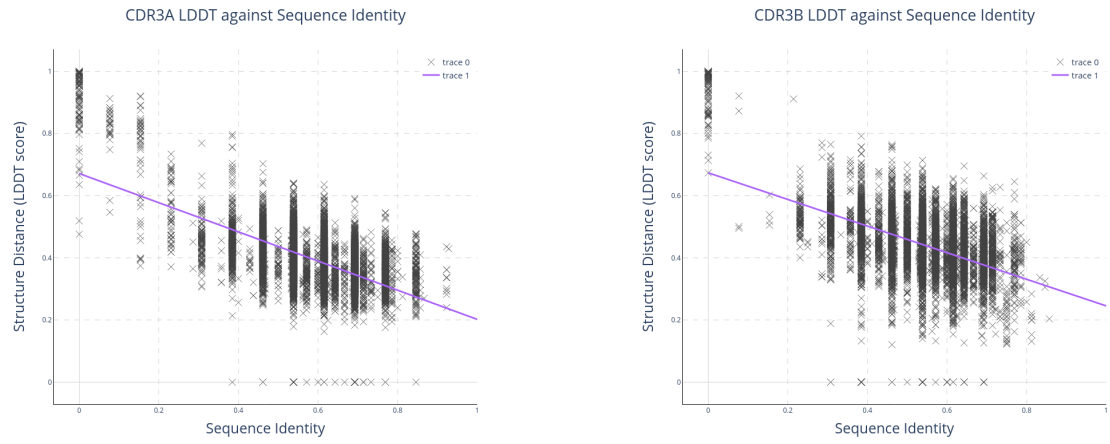

SI Figure 7: Pairwise LDDT score vs sequence identity

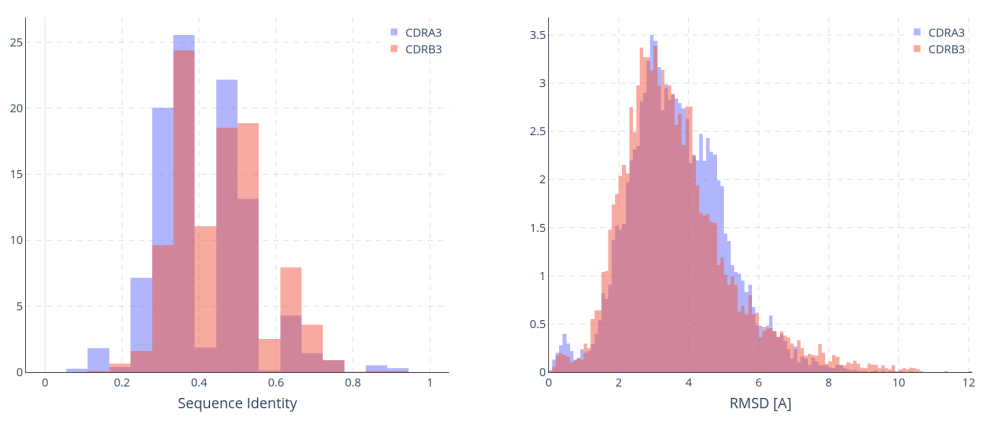

SI Figure 8: Pairwise sequence identity and RMSD (spline upsampled) distributions of the training data of TCRBuilder2+. The distributions of CDR3 $\alpha$  and CDR3 $\beta$  suggest that CDR3 $\alpha$  is as structurally/sequence diverse as CDR3 $\beta$ .

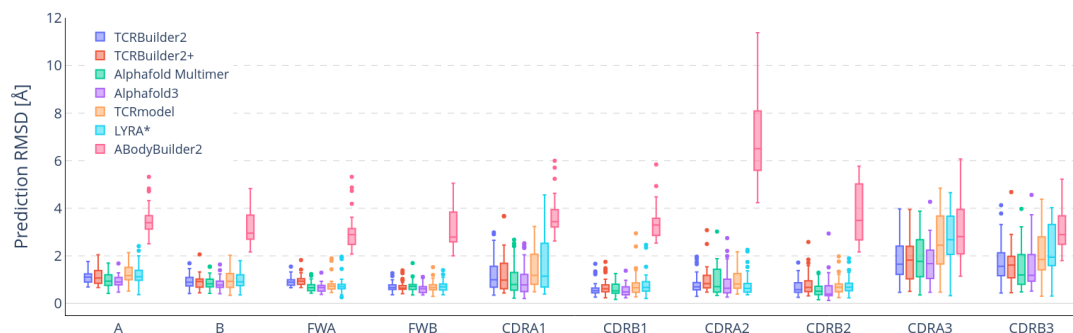

SI Figure 9: Comparison of prediction RMSD by different models, including only the 38/45 test structures for which the homology model LYRA [2] predicted a structure. Sample size of 38; boxes represent the inner quartiles, with the median value the dividing line; whiskers extend to points that lie within 1.5 times the interquartile range of the lower and upper quartile; observations beyond this range are displayed independently.

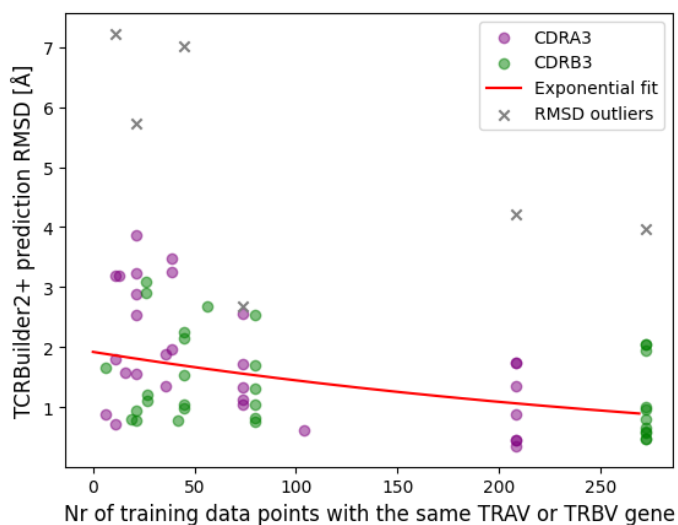

SI Figure 10: Test set TCRBuilder2+ prediction RMSD *vs.* variable gene abundance in training data for CDR3 $\alpha$  (purple), and CDR3 $\beta$  (green). RMSD outliers of the test structures 7l1d, 7rk7 and 6zcx are shown in in grey. TCRBuilder2+ predictions improve for TCR sequences deriving from a variable gene observed more frequently in the training data. The data support a saturation effect; fitting an exponential curve suggests a slight decay, through the variation about the trend remains high.

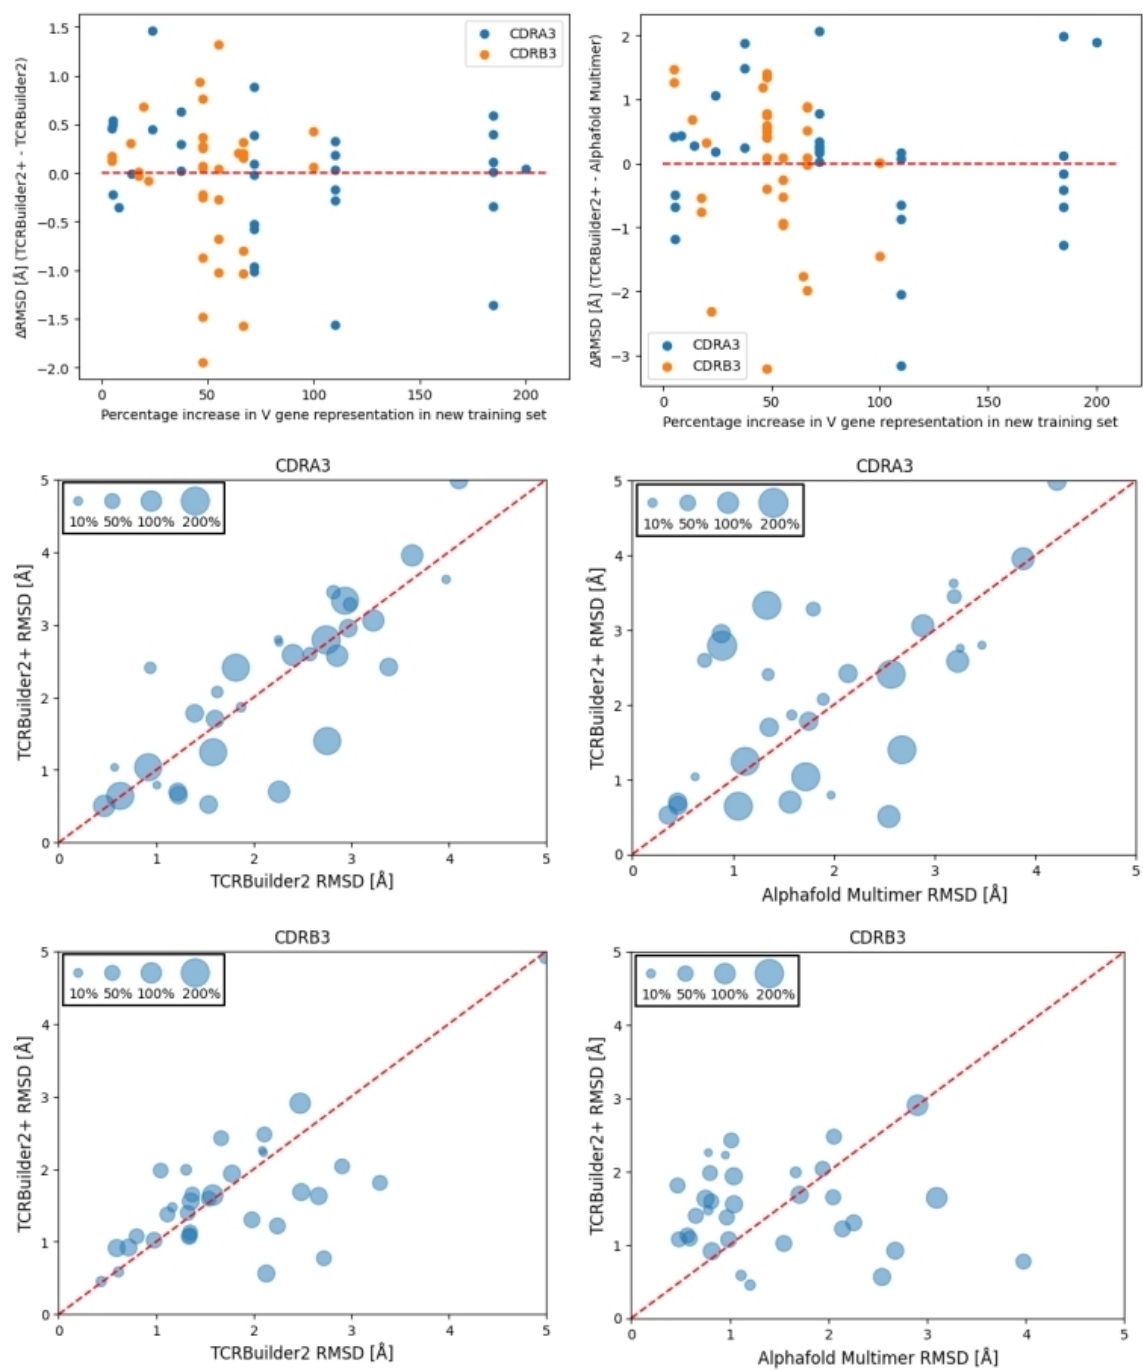

SI Figure 11: RMSD vs relative increase in V gene in training data. a) Difference in RMSD between TCRBuilder2 and TCRBuilder2+ (left) and AlphaFold Multimer and TCRBuilder2+ (right) vs percentage increase in V gene in new training set ( $< 0\text{\AA}$  means TCRBuilder2+ is better). b & c) CDR3 $\alpha$  (b) and CDR3 $\beta$  (c) RMSD of TCRBuilder2+ vs TCRBuilder2 (left) and AlphaFold Multimer (right). Bubble size indicates the percentage increase in datapoints for the TRBV gene of a given test sequence in the new training set compared to the old training set, red dashed line is the identity line at which models perform equivalently.

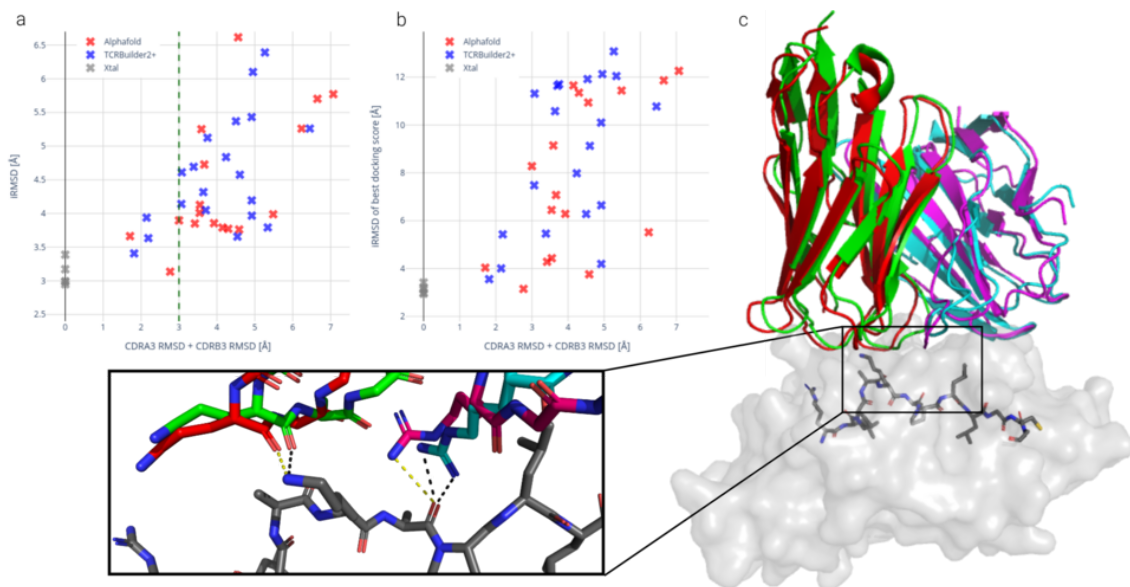

SI Figure 12: a) Best interface RMSD (iRMSD) of docked TCR structures to their cognate antigen. b) iRMSD of the best ranked dock by docking score. Crystal structure re-docks (grey) provide a baseline of realistically attainable iRMSD. Docking iRMSD clearly correlates with CDR3 loop prediction RMSD, with a joint RMSD  $<3 \text{ \AA}$  consistently retrieving a dock with iRMSD  $<4 \text{ \AA}$ . Docking scores do not consistently retrieve the best docked score. c) Docked TCRBuilder2+ structure prediction of 6zlx to crystal structure pMHC. Predicted  $\alpha$  and  $\beta$  chains are red and magenta respectively, original crystal structure  $\alpha$  and  $\beta$  chains are green and cyan respectively. The pMHC is shown as a surface with the peptide as sticks. The docked CDR3 $\alpha$  and CDR3 $\beta$  chains (zoom box) recapture the polar interactions with the peptide (docked interactions in yellow, crystal structure interaction in black).

Interface RMSD vs CDRA3 RMSD of best cluster by HADDOCK score

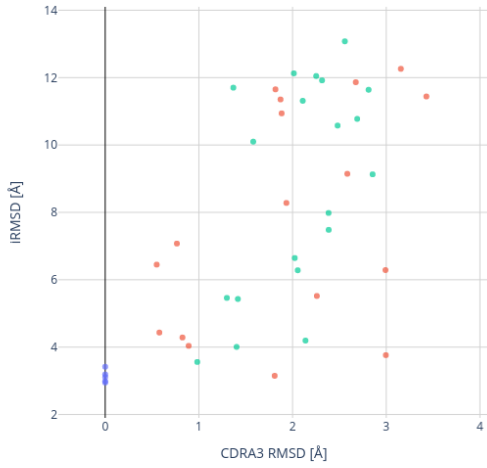

Interface RMSD vs CDRB3 RMSD of best cluster by HADDOCK score

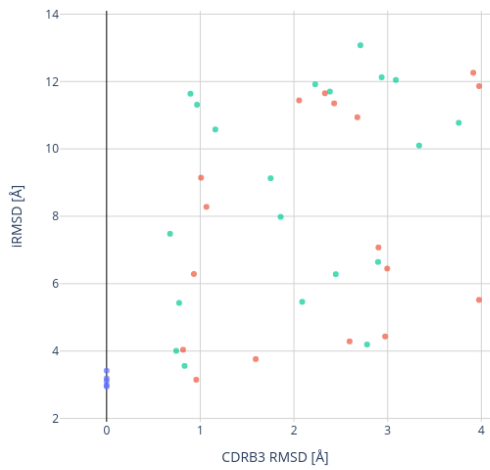

Interface RMSD vs CDRA3 RMSD of best cluster by iRMSD

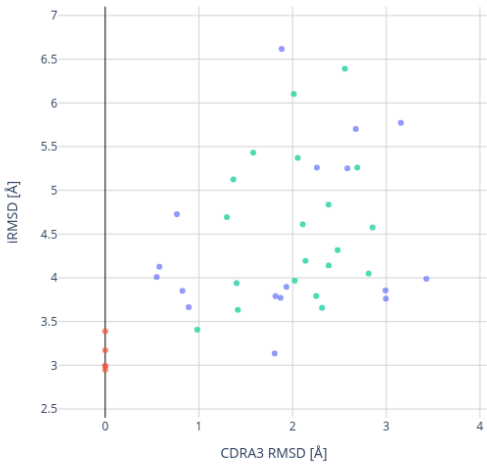

Interface RMSD vs CDRB3 RMSD of best cluster by iRMSD

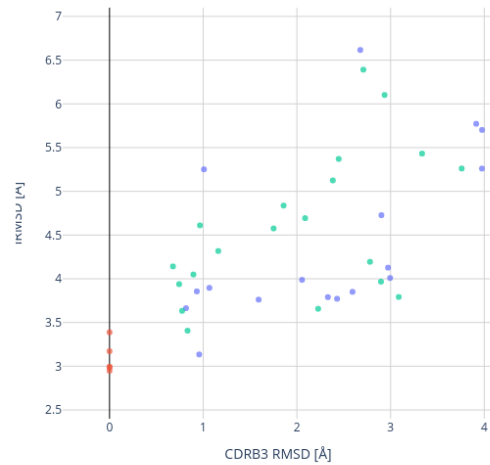

SI Figure 13: iRMSD of best clusters by iRMSD to crystal or HADDOCK score *vs.* CDR3 loop RMSD of TCRBuilder2+ and Alphafold Multimer predictions.

Haddock Score vs Interface RMSD with Structure Types

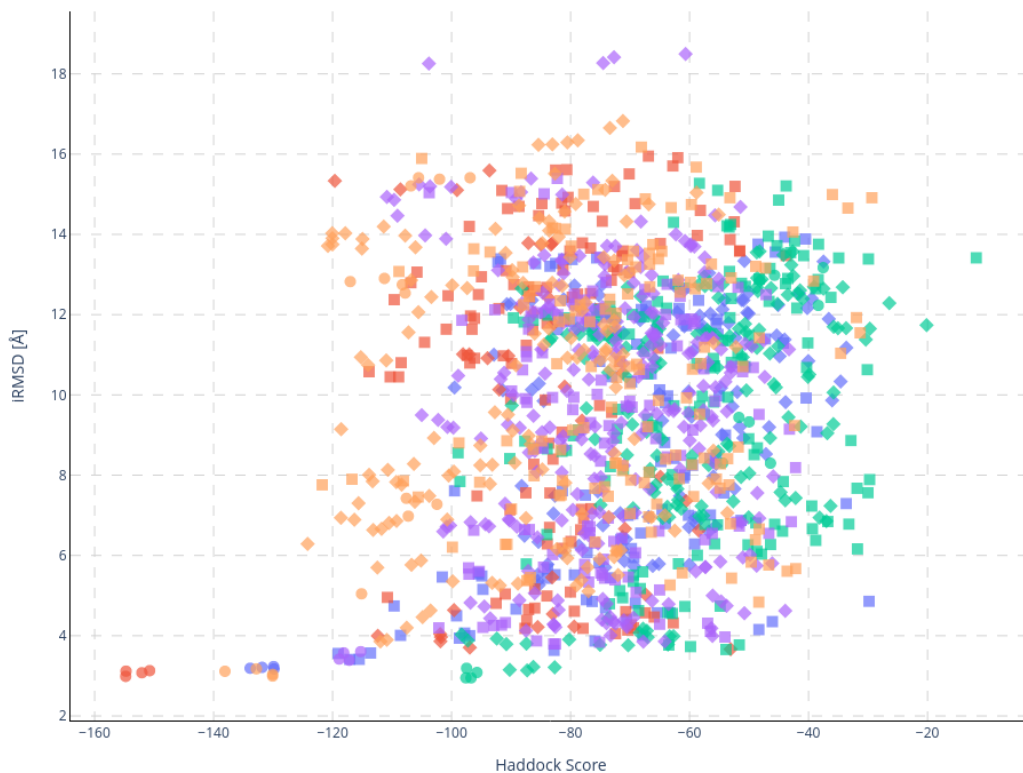

SI Figure 14: All docking clusters iRMSD *vs.* HADDOCK docking score, coloured by PDB code (6zlx: red, 7nme: blue, 7pb2: green, 7rm4: purple, 8d5q: orange). Shapes indicate the type of TCR structure (circle: crystal structure, square: TCRBuilder2+, diamond: AlphaFold-Multimer).

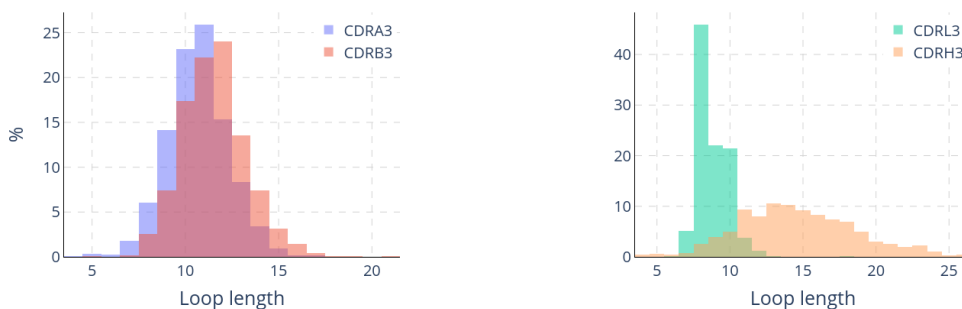

SI Figure 15: Distributions of CDR3 loop length of OTS sampled TCRs (left) and OAS sampled antibodies (right) accompanying Fig. 3c&d.



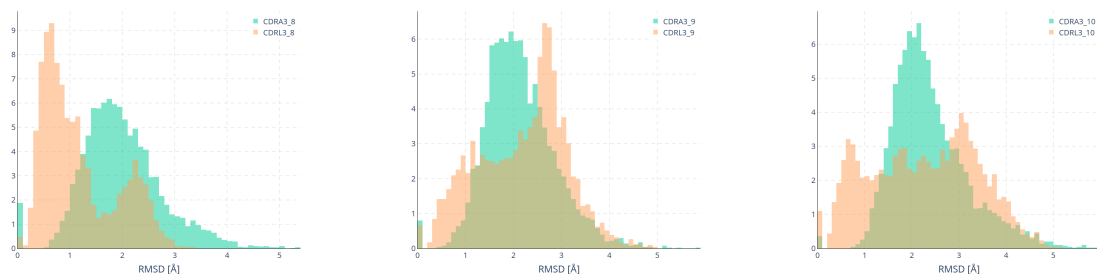

SI Figure 16: Length matched pairwise RMSD distributions of 1000 predicted TCR CDR3 $\alpha$  and antibody CDRL3 loops predicted from OTS with TCRBuilder2+ and OAS with ABodyBuilder2 respectively. Loop lengths of 8, 9 and 10 residues from left to right respectively. CDRL3 RMSD histograms exhibit multiple modes, associated with canonical structures.

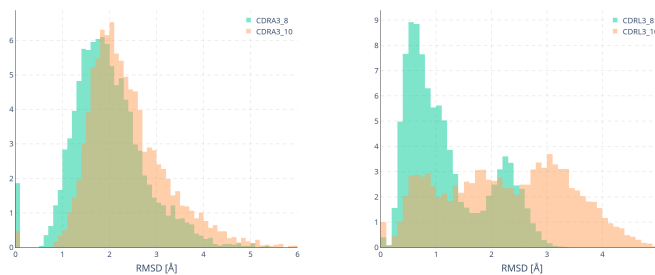

SI Figure 17: Length matched pairwise RMSD distributions of 1000 predicted TCR CDR3 $\alpha$  and antibody CDRL3 loops predicted from OTS with TCRBuilder2+ and OAS with ABodyBuilder2 respectively. Comparison of RMSD distribution of loops of length 8 and 10. Mean RMSD increases with loop length.

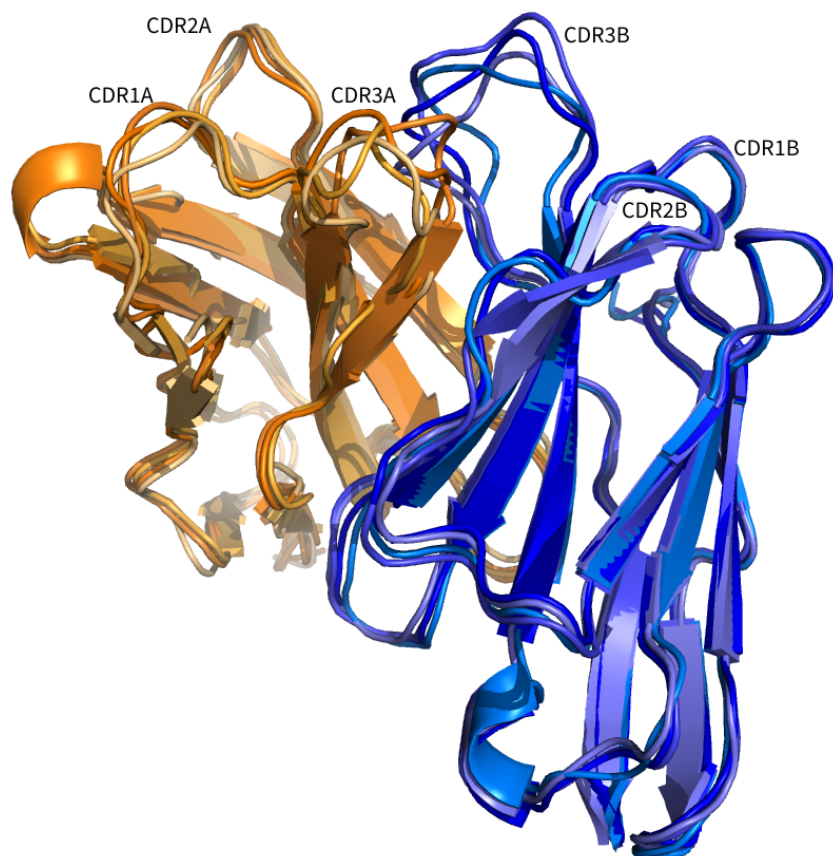

SI Figure 18: Example of TCRBuilder2+ ensemble of four predictions for test set TCR with PDB code 8GVB. Alpha chain in orange, beta chain in blue. The CDR3 lops occupy similar space but display more structural variation across predictions than the CDR1 and CDR2 loops of both chains.

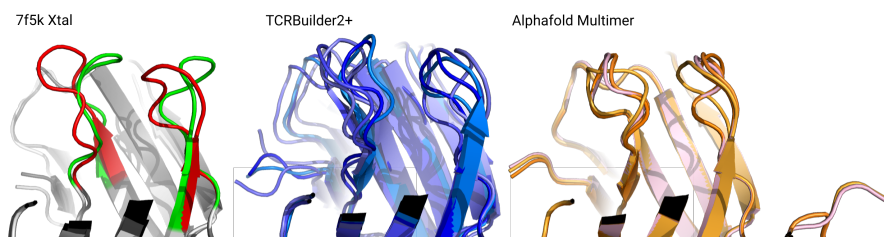

SI Figure 19: Starting conformations used in molecular dynamics (MD) simulations. The 7f5k crystal structure has two distinct conformations (red and green) for both the CDR3 $\alpha$  and CDR3 $\beta$  loop. TCRBuilder2+ predicts four distinct conformations with which we initialised MD simulations. AlphaFold Multimer makes 25 predictions, however many of them are structurally indistinguishable and cluster into a handful of predictions (see SI Fig. 20b). Here, we identified the predictions ranked 0, 1, 14, and 22 as structurally distinct and used them as starting structures for MD simulations.

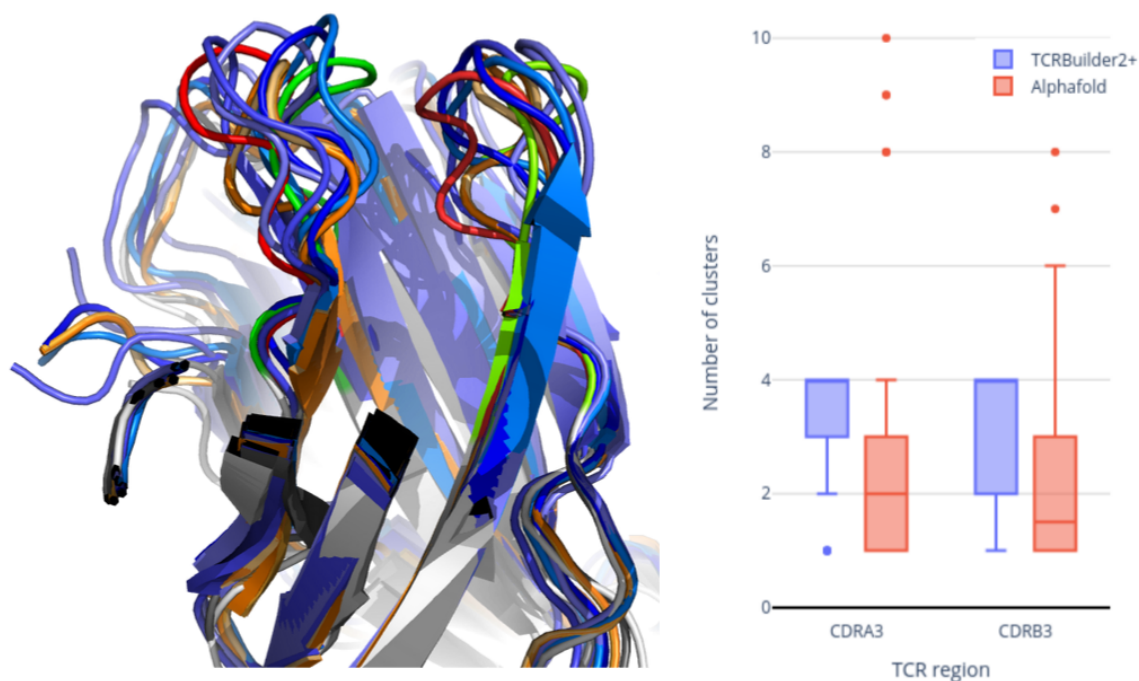

SI Figure 20: a) Multiple CDR3 conformations of 7f5k crystal structure and predicted structures in sliced view. CDR3 $\alpha$  loops are on the left and CDR3 $\beta$  loops are on the right. The green and red loops are the two conformations observed in the apo TCR crystal structure. The blue loops are the four TCRBuilder2+ predictions, the orange loops are the top four ranked AlphaFold-Multimer predictions. The top four AlphaFold-Multimer predictions model the same loop, whereas TCRBuilder2+ produces distinct conformations. Neither TCRBuilder2+ nor AlphaFold-Multimer predictions recapture either of the crystal structure conformations, but certain trends, for instance the ‘inverted S’ shape at the base of the CDR3 $\alpha$  loop, are recapitulated. Molecular dynamics simulations suggest that the predicted conformations are physically plausible (SI Fig. 21) and lie within the space of commonly sampled backbone structure for CDR3 loops of this length. b) Number of distinct CDR3 loop structure clusters per sequence predicted for a cluster threshold of 1Å RMSD. Despite TCRBuilder2+ making four predictions, compared to AlphaFold-Multimer’s default of 25 predictions, the TCRBuilder2+ predictions typically fall into more clusters. Both models predict more conformations for CDR3 $\alpha$  than CDR3 $\beta$  on average. Sample size of 45; boxes represent the inner quartiles, with the median value the dividing line; whiskers extend to points that lie within 1.5 times the interquartile range of the lower and upper quartile; observations beyond this range are displayed independently.

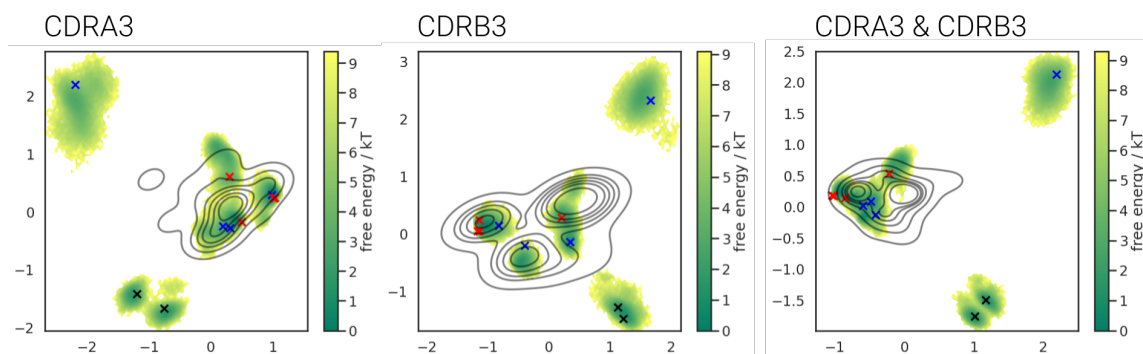

SI Figure 21: Time-lagged independent component analysis (tICA) projections in two dimensions of molecular dynamics trajectories of crystal and predicted CDR3 structures of 7f5k. The structures from which the simulations were initialised are marked as 'x'. The two crystal structure conformations are in black, the four TCRBuilder2+ predictions in blue, and the AlphaFold-Multimer predictions in red. The green shading is the free energy distribution calculated from the states sampled in the MD trajectories. The black topography lines are the projected distribution of CDR3 structures of the same loop length as 7f5k. Predicted loop structures occupy spaces with nearby local free energy minima, indicating that the predicted conformations are relatively stable. TCRBuilder2+ samples a greater range of conformational space than AlphaFold-Multimer, the crystal structure CDR3 loop structures lie beyond the modes of the background distribution.

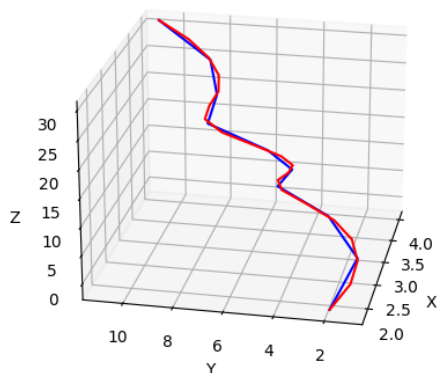

SI Figure 22: Demonstrative visualisation of spline up-sampling on 3D  $C_\alpha$  coordinates of a simulated CDR loop. Original coordinates (blue) are up-sampled (red). The coordinates x, y and z are the atom positions in euclidian space.

### 3 SI Notes (1-3)

#### 3.1 Accurate prediction of both CDR3 $\alpha$ and CDR3 $\beta$ is required for TCR:pMHC interface characterisation using physics-driven docking

As presented in the main manuscript (Sec. 2.2), we sought to assess the extent to which accurate CDR3 $\alpha$  or CDR3 $\beta$  loop structure predictions are key to obtaining useful putative binding poses. We used the software HADDOCK [3] to dock a subset of TCR structures from the test set, both crystal coordinates and models predicted by TCRBuilder2+ and Alphafold-Multimer, to crystal structures of their cognate antigens.

SI Fig. 12a shows the lowest interface RMSD (iRMSD) achieved across the docking run for each model alongside its CDR3 accuracy, while SI Fig. 12b compares CDR3 accuracy to the iRMSD of the ‘best’ dock defined by docking score. A visual inspection of the docks suggests that an iRMSD of less than 4 Å recaptures the pose with which the CDR3 loops bind to the antigen, with moderate recapitulation of the side-chain interactions (SI Fig. 12c).

The baseline re-docks of the crystal structures of TCRs suggest that the best attainable iRMSD is between 3 Å and 3.5 Å, due to the limited pose sampling of high-throughput docking (SI Fig. 12a & b). Meanwhile, the data on TCR models suggest clearly that accurate prediction of both the CDR3 $\alpha$  and the CDR3 $\beta$  loops is required to enable accurate docking, defined as iRMSD < 4 Å, particularly when relying on docking score to retrieve the best poses. Specifically, we find that a total RMSD over the CDR3 $\alpha$  and CDR3 $\beta$  < 3Å consistently enables the retrieval of a dock with an iRMSD < 4Å. It is not possible to identify a consistent accuracy threshold when considering the CDR3 $\alpha$  or CDR3 $\beta$  individually (SI Fig. 13). This emphasises that both the CDR3 $\alpha$  and CDR3 $\beta$  tend to contribute to antigen binding and aligns with our previous finding that CDR3 $\alpha$  loops display similar structure diversity to CDR3 $\beta$  loops.

Though we were able to retrieve TCR:pMHC poses with iRMSD < 4 Å for nearly half of the TCRs, frequently these were not the docks with the best docking score. Quantitatively, while the docking scores of the best ranked dock correlate with iRMSD, only 31.1% (14/45) of the best docks by iRMSD also had the optimal docking score. Furthermore, as the docking scores are calculated as weighted sums of energy terms derived from the docked structure and vary across simulations it is not possible to determine a threshold for docking scores that holds for all TCRs and pMHCs

47 (SI Fig. 14). The unreliability of general pose ranking functions in this domain limits docking’s  
48 practical applicability for investigating TCR:pMHC complementarity.

49 Finally, we investigated whether using multiple distinct TCR structure predictions for each  
50 sequence improves docking outcomes; TCRBuilder2+ generates four predictions per sequence (Fig.  
51 1a) and Alphafold-Multimer generates 25, from which one is selected at run time as the best-  
52 ranked model. When we docked these alternate structure predictions, we find that the best-ranked  
53 TCRBuilder2+ model achieves the lowest iRMSD dock in three of five case studies, while this  
54 is only the case for one of five for Alphafold-Multimer. We hypothesise that this is due to the  
55 combinatorially expanded search space when including multiple conformations, thereby increasing  
56 the chances of retrieving a good docked pose. In the absence of a crystal structure, incorporating  
57 multiple distinct TCR conformation predictions in a pipeline may enable the retrieval of better  
58 docks, although we note again that the limitations of docking scores mean that identifying the best  
59 pose across runs remains challenging.

## 60 Molecular Docking Methods

61 We used HADDOCK [3] to run docking simulations. The active residues of the paratope were  
62 defined as residues of the six CDR loops according to IMGT numbering [4] and the active residues  
63 of the epitope were defined as the residues of the peptide presented by the pMHC. Unburied residues  
64 within 6.5Å of the peptide residues are defined as passive residues of the interaction site. No residues  
65 are defined as passive in the paratope.

66 We selected the TCR crystal structures in 6zqx, 7nme, 7pb2, 7rm4, and 8d5q for the docking  
67 simulations, as they are crystallised in complex with pMHC and their TCRBuilder2+ and Alphafold  
68 Multimer CDR3 prediction accuracies span a range of RMSD values. For each structure we ran  
69 docking simulations of the original crystal TCR structure and every TCR structure prediction by  
70 TCRBuilder2+ and Alphafold Multimer that clustered into different CDR3 $\alpha$  or CDR3 $\beta$  conformations  
71 by greedy clustering with a threshold of 1Å. Each simulation results in 200 docked poses  
72 ranked with HADDOCK’s docking score reflective of the enthalpy of the docked interface, clustered  
73 by RMSD to the best ranked dock.

74 We also evaluated docked pose quality by the interface RMSD (iRMSD) to the original crystal  
75 structure. iRMSD is calculated as the RMSD between all heavy atoms in the interface after aligning

76 the dock to the crystal by the MHC backbone atoms (N,  $C_\alpha$ , C, and O). The interface was defined  
77 as all residues of the TCR and pMHC for which the  $C_\alpha$  atoms were within 8Å.

### 3.2 Molecular dynamics suggests ensembles of models generated by TCR structure predictors may represent alternative, physically plausible apo states

TCR CDR3 loops have been hypothesised to exhibit structural flexibility, particularly when compared to antibody CDR3 loops [5–9]. This provides a challenge to any method that offers a single TCR CDR3 loop conformation prediction and could disproportionately limit expected accuracy. In the main manuscript, we primarily benchmarked the ‘top-ranked’ predictions of TCRBuilder2+ and Alphafold-Multimer. However, these deep learning models can return multiple predicted structures, which we can analyse to assess whether they could represent physically plausible sets of conformations. TCRBuilder2+ is comprised of an ensemble of four models, each trained with different training and validation splits, and therefore produces four predictions for each sequence. Alphafold-Multimer uses an ensemble of five models which are fine-tuned in two stages from the best performing pre-trained model with different random seeds [10], each of which makes five different predictions for a single TCR sequence, resulting in 25 structures.

We began by investigating the conformational space sampled by the TCRBuilder2+ and Alphafold-Multimer predictions and find that TCRBuilder2+ explores more distinct conformations, despite Alphafold-Multimer producing over six-fold more models. We used greedy clustering with a threshold of 1Å RMSD to investigate the array of conformations predicted by TCRBuilder2+ and Alphafold Multimer (SI Fig. 20) and found that TCRBuilder2+ usually predicts four distinct conformations for both the CDR3 $\alpha$  and CDR3 $\beta$  loop, while Alphafold Multimer predictions typically fall into just one or two clusters.

In line with our finding that CDR3 $\alpha$  loops are at least as structurally diverse as CDR3 $\beta$  loops, both models predict a greater number of conformational clusters for the CDR3 $\alpha$  than the CDR3 $\beta$  (SI Fig.20, SI Table 11). It is unfortunately impossible to disentangle whether this is due to greater uncertainty of the model predictions because the CDR3 $\alpha$  is inherently more difficult to predict, hence leading to less conserved predictions by both models, or whether this is due to the CDR3 $\alpha$  being intrinsically more flexible leading to the prediction of more diverse conformations. In the absence of experimental data that captures flexibility in TCR structures, we use molecular dynamics to assess the physical plausibility of the multiple predicted conformations, thereby evaluating whether predicted structures can be categorised as incorrect. Analysis of these simulations is consistent with



108 more than one CDR3 loop conformation being physically plausible, thereby both supporting the  
109 hypothesis that CDR3 loops of TCRs may be flexible [6, 7, 9, 11], and questioning whether regress-  
110 ing structure prediction models towards single crystal structures leads to useful *in-vivo* structure  
111 predictions.

112 Due to the computational expense of running molecular dynamics simulations, we examined  
113 the case study of the *apo* crystal structure 7f5k, which we select on the basis that it is not in  
114 complex with an antigen, is contained in our filtered test set (SI Table 1), and exhibits two distinct  
115 conformations for both the CDR3 $\alpha$  and CDR3 $\beta$  in the crystal structure(SI Fig. 20).

116 We then selected four predictions with distinct conformations made by both TCRBuilder2+ and  
117 Alphafold-Multimer. Since Alphafold-Multimer makes 25 predictions, we use the four structures  
118 that ranked best by pTM score and fall into different conformation clusters. This results in a  
119 final set of 10 structures for the same TCR sequence with which we initialise molecular dynamics  
120 simulations (SI Fig. 19).

121 SI Fig. 21 shows the free energy landscape sampled by the simulation trajectories. After being  
122 initialised from their predicted or crystal conformation (SI Fig. 19), the CDR3 loops explore the  
123 local conformation space, but no macro transitions away from the initial predictions are observed.  
124 This suggests that while the predictions do not recapture the loop structure of the crystallised  
125 TCR, the predicted structures are energetically stable within the MD forcefield. This supports the  
126 hypothesis that multiple loop conformations may be valid, particularly for *apo* (unbound) TCRs,  
127 and that, despite neither model being trained to predict multiple conformations, both Alphafold-  
128 Multimer and TCRBuilder2+ could be capturing multiple plausible structures.

## 129 **Molecular dynamics methods**

130 We performed unbiased molecular dynamics simulations on the TCR in PDB entry 7f5k, as it  
131 displays multiple distinct conformations for both the CDR3 $\alpha$  and CDR3 $\beta$  in the crystal structure  
132 and was not included in the training set. MD was run both on the crystal poses and on models of  
133 the TCR sequence generated by TCRBuilder2+ and AlphaFold-Multimer,

134 All systems were prepared, and simulations performed, using OpenMM v7.7 [12]. N-methyl  
135 groups were used to cap C-termini using an in-house script. Next, using pdbfixer [12], we protonated  
136 the models at a pH of 7.5, soaked them in truncated octahedral water boxes with a padding distance

137 of 1 nm, and added sodium or chloride counter-ions to neutralise charges and then NaCl to an ionic  
138 strength of 150 nM. Prior to placing molecules in boxes, we aligned all variable region structures  
139 on the first copy of the variable region in the 7f5k crystal structure. We parameterised the systems  
140 using the Amber14-SB forcefield [13] and modelled water molecules using the TIP3P-FB model  
141 [14]. Non-bonded interactions were calculated using the particle mesh Ewald method [15] using a  
142 cut-off of distance of 0.9 nm, with an error tolerance of  $5 \times 10^{-4}$ . Water molecules and heavy atom-  
143 hydrogen bonds were rigidified using the SETTLE [16] and SHAKE [17] algorithms, respectively.  
144 We used hydrogen mass repartitioning [18] to allow for 4 fs time steps. Simulations were run using  
145 the mixed-precision CUDA platform in OpenMM using the Middle Langevin Integrator with a  
146 friction coefficient of  $1 \text{ ps}^{-1}$  and the Monte-Carlo Barostat set to 1 atm. We equilibrated systems  
147 using a multi-step protocol detailed in SI Table 12. Following equilibration, we performed 2  $\mu\text{s}$  of  
148 unrestrained simulation of the NPT ensemble at 300 K.

149 We performed dimensionality reduction on the resultant trajectories through Time-lagged in-  
150 dependent component analysis (TICA) [19] using PyEMMA2 [20]. We selected the sine and cosine  
151 transforms of either CDR3 $\alpha$ , CDR3 $\beta$ , or CDR3 $\alpha$  and CDR3 $\beta$  loop backbone dihedral angles as  
152 features, and set 5 ns as the lag time. We also embedded the starting structures for each simulation  
153 in the same resultant space. Lastly, to compare other known experimental structures to the con-  
154 formations observed during simulations, we identified structures of TCR receptors in our training  
155 set where both the CDR3 $\alpha$  and CDR3 $\beta$  loops had the same number of residues as the simulated  
156 system (11 residues according to the IMGT definition [4] for either loop) and embedded their CDR3  
157 backbone dihedrals in the same coordinate space.

### 158 **3.3 Structural distance calculation for length-mismatched CDR loops**

159 Protein structures are typically compared by calculating the RMSD between atom positions, often  
160 restricted to  $C_\alpha$ . However, this poses a problem when comparing chains of different lengths. In  
161 order to compare different length CDR3 loop structures, we implement a method for upsampling  
162 of the backbone coordinates to match in length. We use spline upsampling to re-sample the shorter  
163 loop  $C_\alpha$  coordinates by polynomial interpolation, and compare the new coordinates. For chains  
164 of the same length this distance calculation is equivalent to standard RMSD. Empirically, we find  
165 that this method is upper bound by the RMSD, which we find by calculating the distance between  
166 two equivalent length loops after upsampling. SI Fig. 22 is an illustrative example of original  
167 backbone coordinates (blue) and the upsampled coordinates (red). We also implemented a version  
168 of the dynamic time warping (DTW) algorithm, an alternative method based on optimally matching  
169 coordinates in the longer loop to coordinates in the shorter loop. While this method is in use, it  
170 is liable to spurious, non-RMSD like results when comparing very different structures, such that  
171 sequence aligned coordinates are substantially further than DTW match coordinates, resulting in  
172 low distances despite structural dissimilarity. We therefore opt for the former method; both methods  
173 are implemented as a small python package with a common API ([https://github.com/npqst/](https://github.com/npqst/different-length-euclidian-rmsd)  
174 `different-length-euclidian-rmsd`).

## SI References

- 175 [1] V. Giudicelli. “IMGT/GENE-DB: a comprehensive database for human and mouse immunoglob-  
176 ulin and T cell receptor genes”. In: *Nucleic Acids Research* (2004). DOI: 10.1093/nar/gki010.  
177
- 178 [2] Michael Schantz Klausen et al. “LYRA, a webserver for lymphocyte receptor structural mod-  
179 eling”. In: *Nucleic Acids Research* (2015). DOI: 10.1093/NAR/GKV535.
- 180 [3] G. C.P. Van Zundert et al. “The HADDOCK2.2 Web Server: User-Friendly Integrative Mod-  
181 eling of Biomolecular Complexes”. In: *Journal of Molecular Biology* (2016). DOI: 10.1016/j.  
182 jmb.2015.09.014.
- 183 [4] Marie Paule Lefranc et al. “IMGT, the international ImMunoGeneTics information sys-  
184 tem<sup>®</sup>”. In: *Nucleic Acids Research* (2005). DOI: 10.1093/nar/gki065.
- 185 [5] Wing Ki Wong, Jinwoo Leem, and Jinwoo Leem. “Comparative Analysis of the CDR Loops of  
186 Antigen Receptors”. In: *Frontiers in Immunology* (2019). DOI: 10.3389/FIMMU.2019.02454/  
187 BIBTEX.
- 188 [6] Christopher J. Holland et al. “In Silico and Structural Analyses Demonstrate That Intrinsic  
189 Protein Motions Guide T Cell Receptor Complementarity Determining Region Loop Flexi-  
190 bility”. In: *Frontiers in Immunology* (2018). DOI: 10.3389/fimmu.2018.00674.
- 191 [7] James E. Crooks et al. “The Hypervariable Loops of Free TCRs Sample Multiple Distinct  
192 Metastable Conformations in Solution”. In: *Frontiers in Molecular Biosciences* (2018). DOI:  
193 10.3389/fmolb.2018.00095.
- 194 [8] Arjun K. Mishra and Roy A. Mariuzza. “Insights into the Structural Basis of Antibody  
195 Affinity Maturation from Next-Generation Sequencing”. In: *Frontiers in Immunology* (2018).  
196 DOI: 10.3389/fimmu.2018.00117.
- 197 [9] Brian M. Baker et al. “Structural and dynamic control of T-cell receptor specificity, cross-  
198 reactivity, and binding mechanism”. In: *Immunological Reviews* (2012). DOI: 10.1111/j.  
199 1600-065X.2012.01165.x.
- 200 [10] Richard Evans et al. “Protein complex prediction with AlphaFold-Multimer”. In: *bioRxiv*  
201 (2022). DOI: 10.1101/2021.10.04.463034.

- 202 [11] Stephanie Gras et al. “A structural voyage toward an understanding of the MHC-I-restricted  
203 immune response: Lessons learned and much to be learned”. In: *Immunological Reviews*  
204 (2012). DOI: 10.1111/j.1600-065X.2012.01159.x.
- 205 [12] Peter Eastman et al. “OpenMM 7: Rapid development of high performance algorithms for  
206 molecular dynamics”. In: *PLoS Computational Biology* (2017). DOI: 10.1371/journal.pcbi.  
207 1005659.
- 208 [13] James A. Maier et al. “ff14SB: Improving the Accuracy of Protein Side Chain and Backbone  
209 Parameters from ff99SB”. In: *Journal of Chemical Theory and Computation* (2015). DOI:  
210 10.1021/acs.jctc.5b00255.
- 211 [14] W.L.; Jorgsen et al. “Comparison of simple potential functions for simulating liquid water”.  
212 In: *Water in Organic Synthesis* (1983). DOI: 10.1055/sos-sd-206-00006.
- 213 [15] Tom Darden, Darrin York, and Lee Pedersen. “Particle mesh Ewald: An N·log(N) method for  
214 Ewald sums in large systems”. In: *The Journal of Chemical Physics* (1993). DOI: 10.1063/  
215 1.464397.
- 216 [16] Shuichi Miyamoto and Peter A Kollman. “Settle: An analytical version of the SHAKE and  
217 RATTLE algorithm for rigid water models”. In: *Journal of Computational Chemistry* (1992).  
218 DOI: 10.1002/jcc.540130805.
- 219 [17] Jean Paul Ryckaert, Giovanni Ciccotti, and Herman J C Berendsen. “Numerical integration  
220 of the cartesian equations of motion of a system with constraints: molecular dynamics of n-  
221 alkanes”. In: *Journal of Computational Physics* (1977). DOI: 10.1016/0021-9991(77)90098-  
222 5.
- 223 [18] Chad W Hopkins et al. “Long-time-step molecular dynamics through hydrogen mass reparti-  
224 tioning”. In: *Journal of Chemical Theory and Computation* (2015). DOI: 10.1021/ct5010406.
- 225 [19] Lutz Molgedey and H G Schuster. “Separation of a mixture of independent signals using time  
226 delayed correlations.” In: *Physical review letters* (1994).
- 227 [20] Martin K. Scherer et al. “PyEMMA 2: A Software Package for Estimation, Validation, and  
228 Analysis of Markov Models”. In: *Journal of Chemical Theory and Computation* (2015). DOI:  
229 10.1021/acs.jctc.5b00743.
